# Supplementary material for: Integrated Analysis of Oncogenic Networks in Colorectal Cancer Identifies GUCA2A as a Molecular Marker
Source: PubMed Central journal article supplement (PMC6701329; doi:10.1155/2019/6469420), 2019-07-28

Figure s1

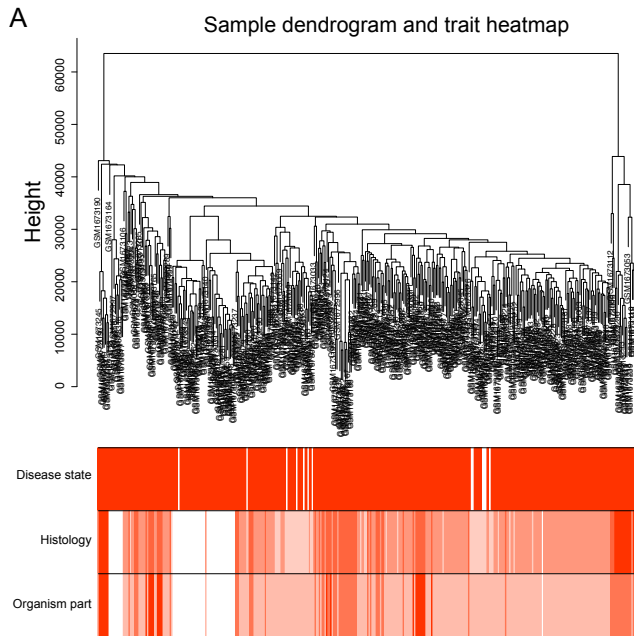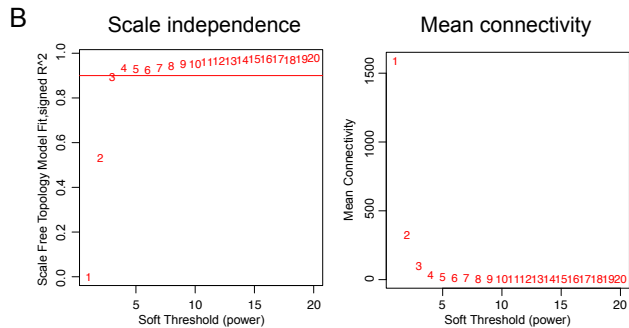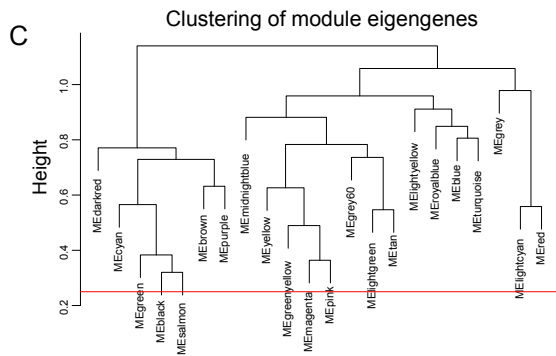

Figure s2

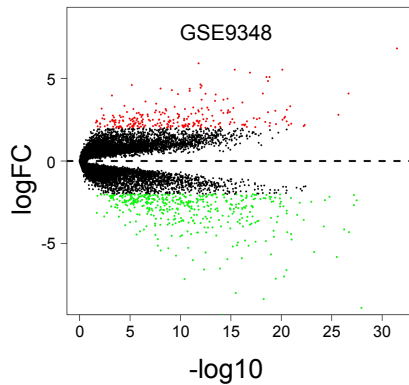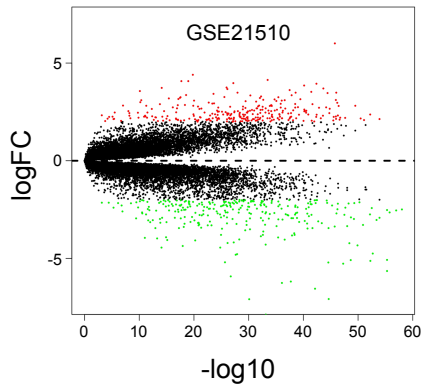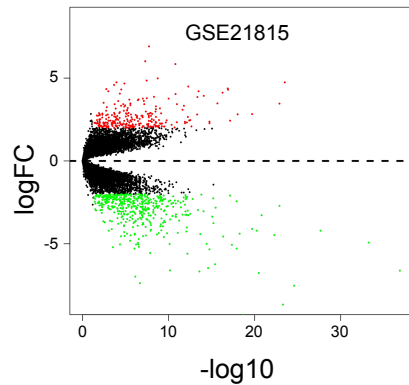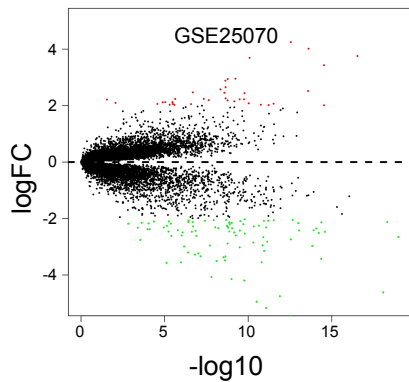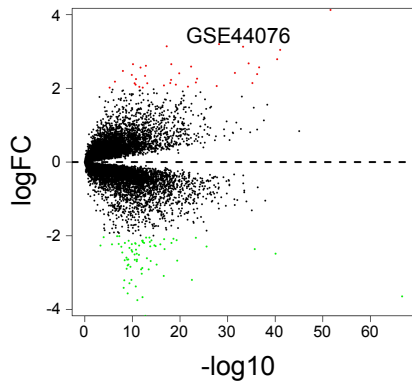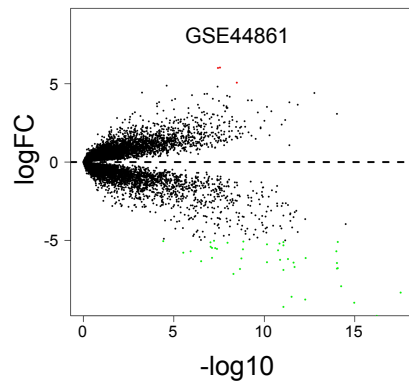

Supplement: 6469420.f1.pdf [file 6469420.f1.pdf]
